# Supplementary material for: Tetraalkylammonium hydroxide-assisted ionothermal synthesis and characterization of LTA-type aluminophosphate zeotypes with high structural stability after detemplation and hydration
Source: Royal Society of Chemistry journal article supplement (doi:10.1039/c8nj03462a), 2018-01-01
Supplement: c8nj03462a1.pdf [file c8nj03462a1.pdf]

Supplementary Information for New Journal of Chemistry

**Tetraalkylammonium hydroxide-assisted ionothermal synthesis  
and characterization of LTA-type aluminophosphate zeotypes with  
high structural stability to detemplation and hydration**

Yutong Lin,<sup>a</sup> Ke Guo,<sup>a</sup> Miao Wang,<sup>a</sup> Shuo Tao,<sup>b</sup> Ling Zhang<sup>c</sup> and Ying Wei<sup>\*a</sup>

<sup>a</sup> State Key Laboratory of Organic-Inorganic Composites, Beijing Key Laboratory of Energy Environmental Catalysis, Beijing University of Chemical Technology, Beijing 100029, China. E-mail: weiyi@mail.buct.edu.cn

<sup>b</sup> Shandong Provincial Key Laboratory of Chemical Energy Storage and Novel Cell Technology, School of Chemistry and Chemical Engineering, Liaocheng University, Liaocheng, Shandong 252059, China.

<sup>c</sup> SynCat@Beijing, Synfuels China Technology Co. Ltd, Beijing 101400, China.

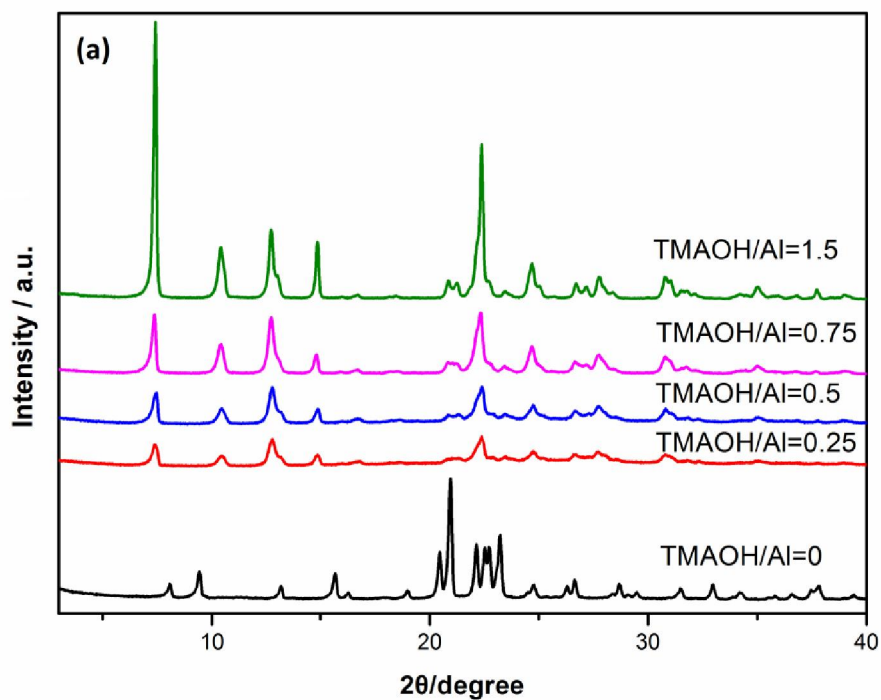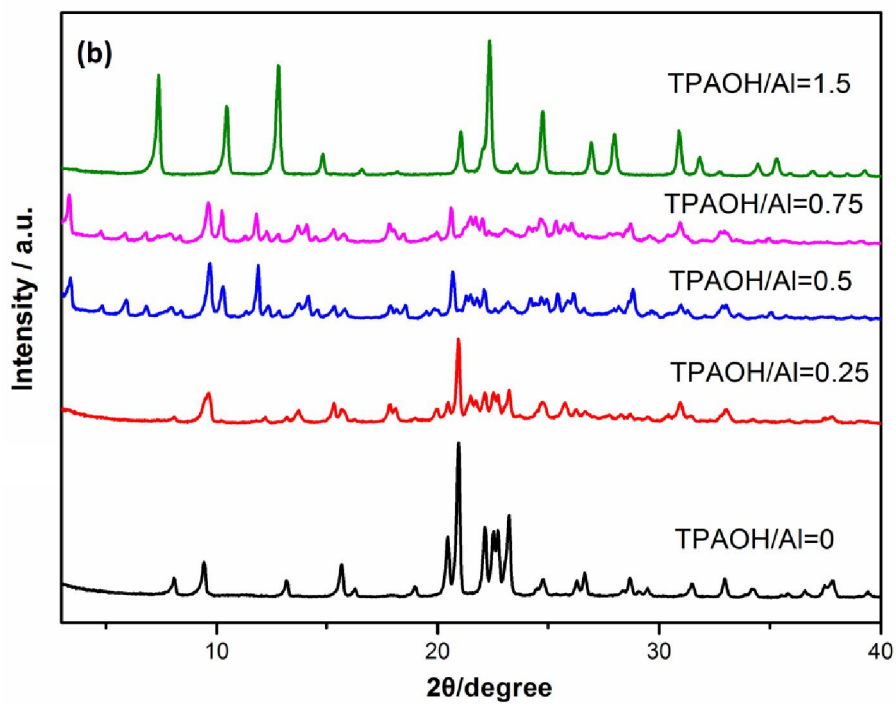

Fig. S1 XRD patterns of the products obtained at different concentration of TAAOH with initial synthesis gel composition 1  $\text{Al}_2\text{O}_3$  : 1  $\text{P}_2\text{O}_5$  : 80 [emim]Br : 2 HF : 3 TAAOH. (a) TAAOH=TMAOH; (b) TAAOH=TPAOH.

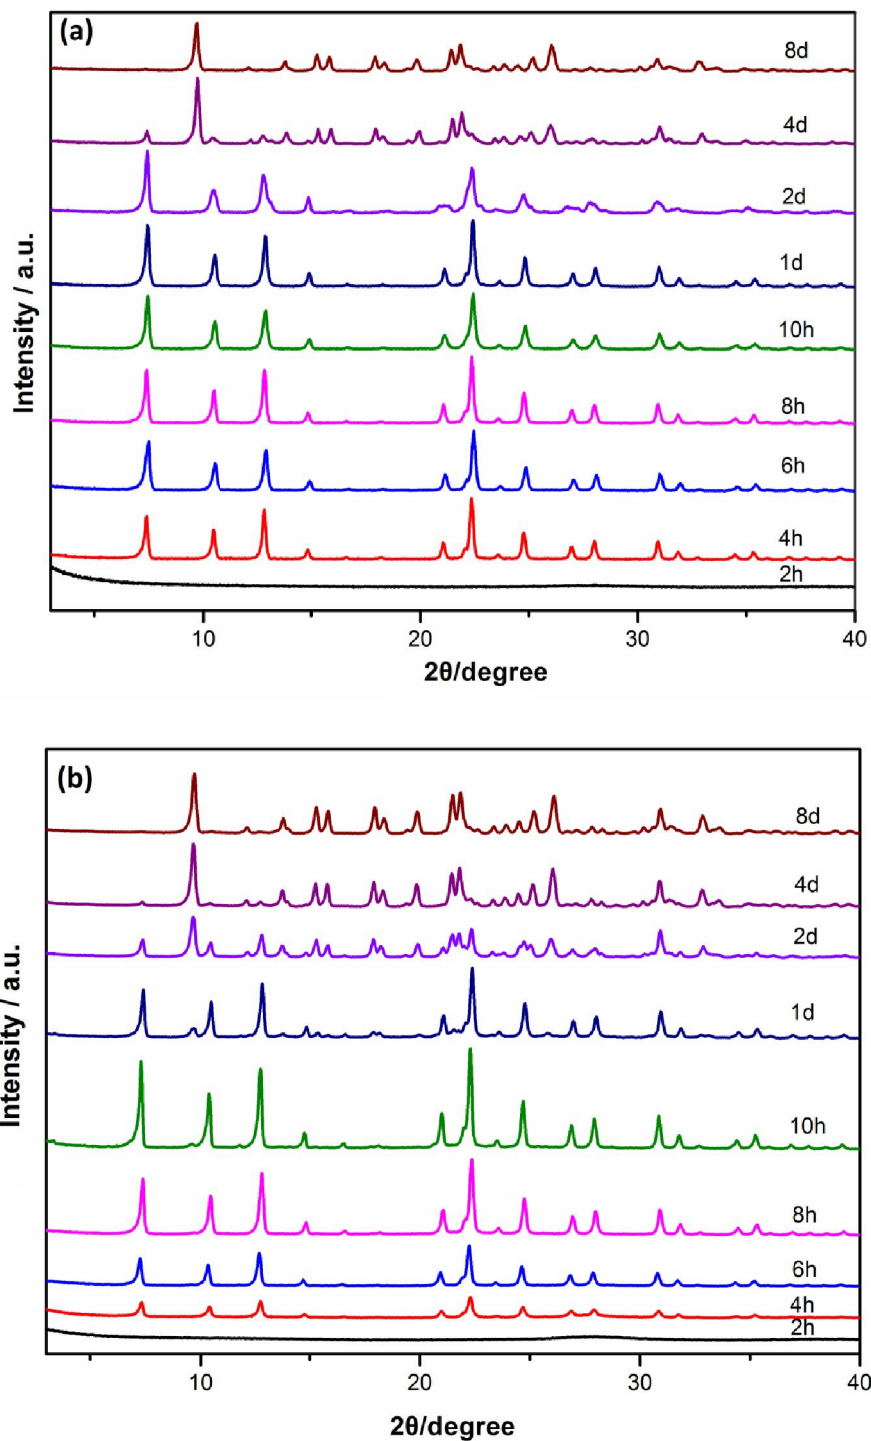

Fig. S2 XRD patterns of the products obtained at different crystallization time with initial synthesis gel composition 1  $\text{Al}_2\text{O}_3$  : 1  $\text{P}_2\text{O}_5$  : 80 [emim]Br : 2 HF : 3 TAAOH. (a) TAAOH=TMAOH; (b) TAAOH=TPAOH.
